# Supplementary material for: PINK1/Parkin-mediated mitophagy inhibits osteoblast apoptosis induced by advanced oxidation protein products
Source: PubMed Central journal article supplement (PMC9905061; doi:10.1038/s41419-023-05595-5), 2023-02-07

# Figure2

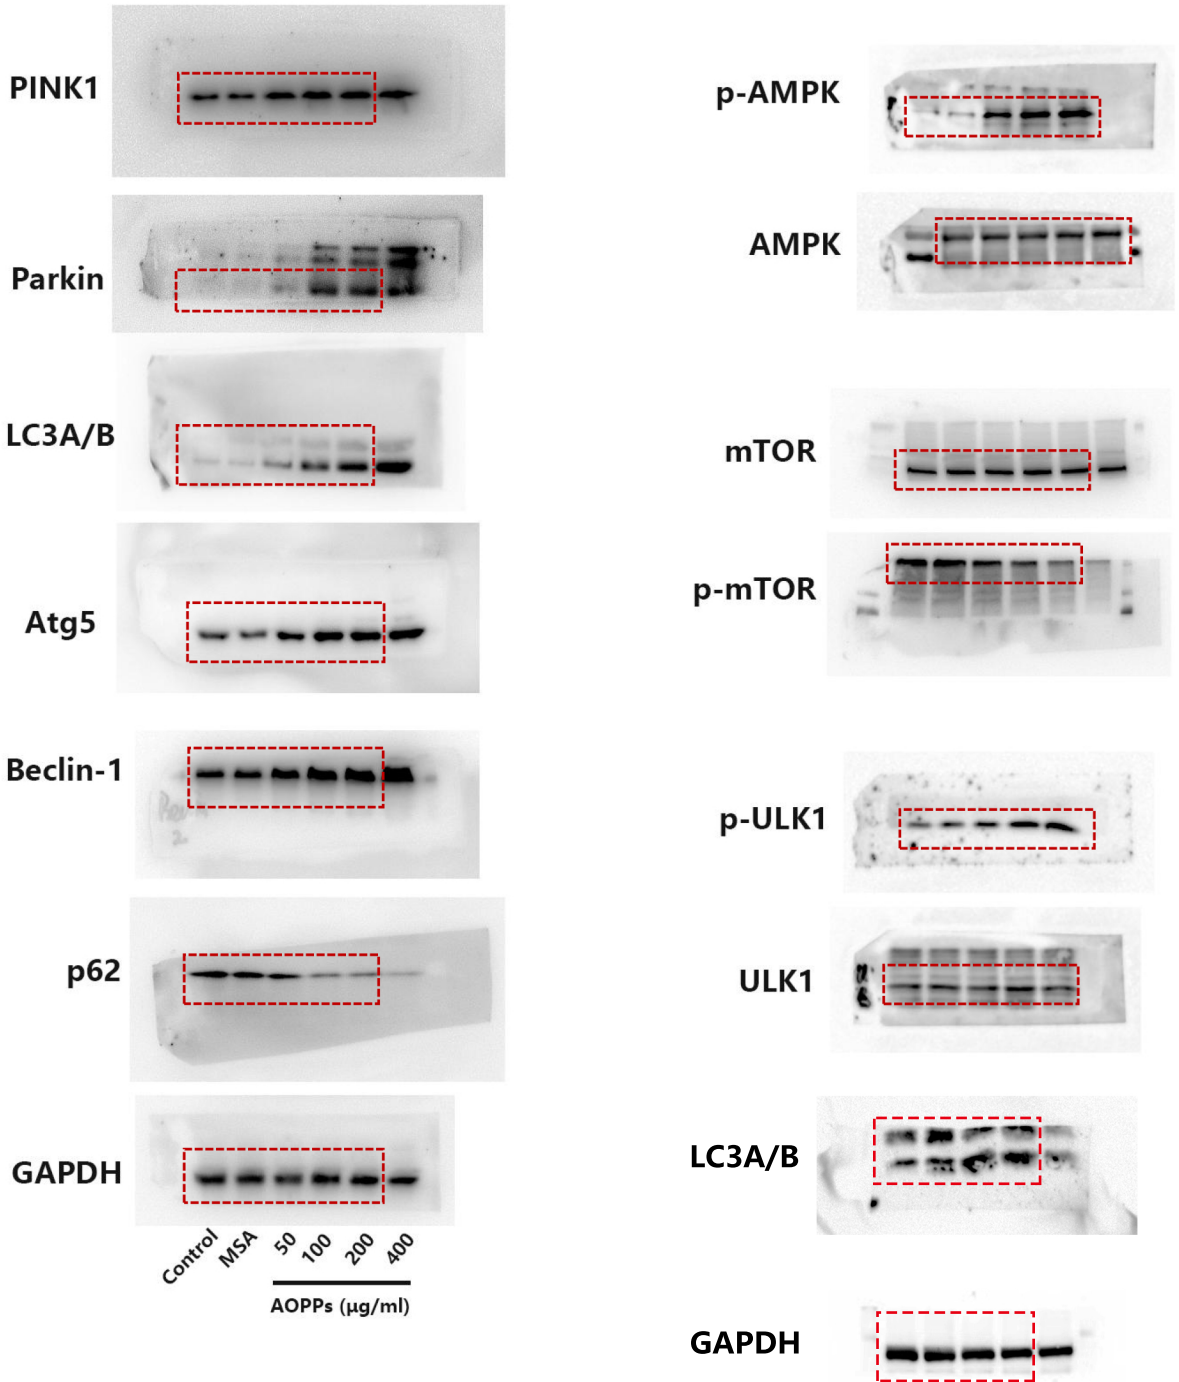

# Figure3

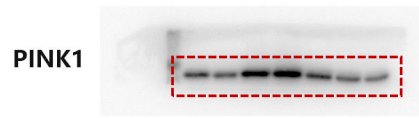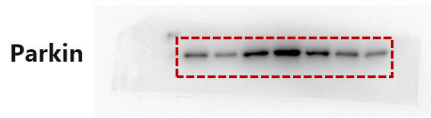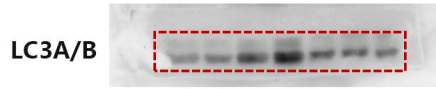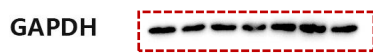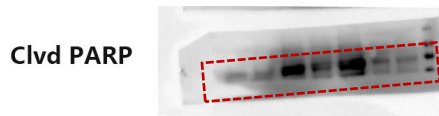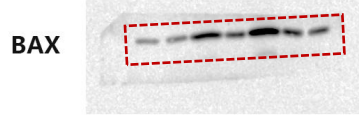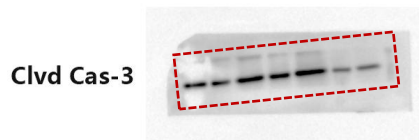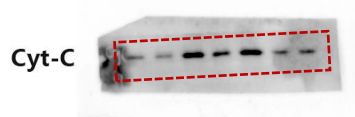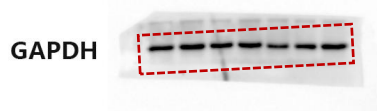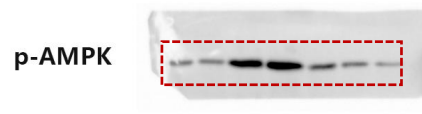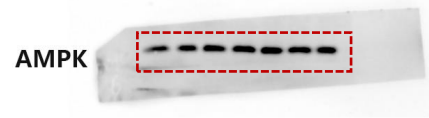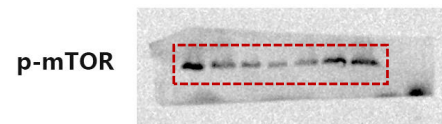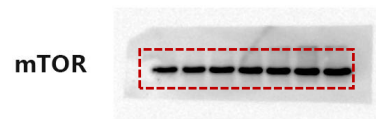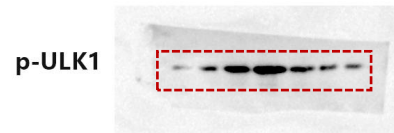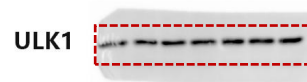

# Figure4

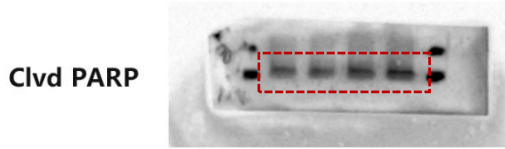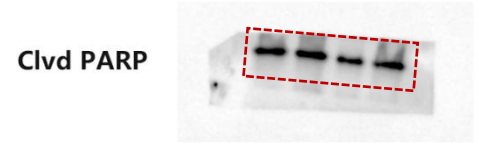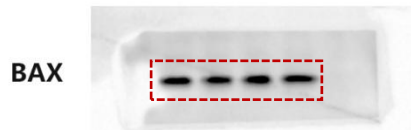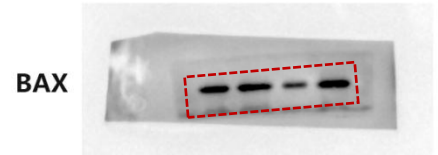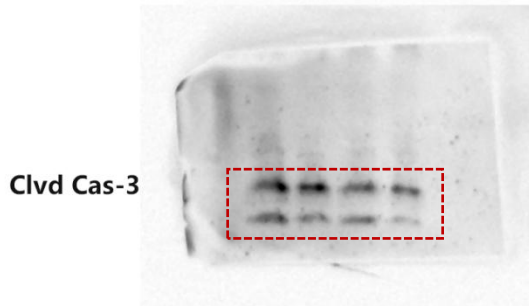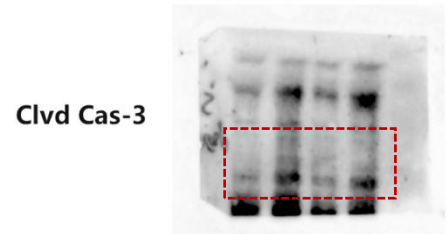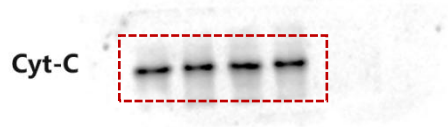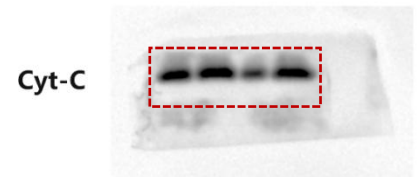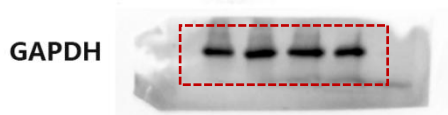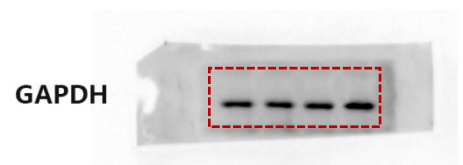

# Figure6 & Figure7

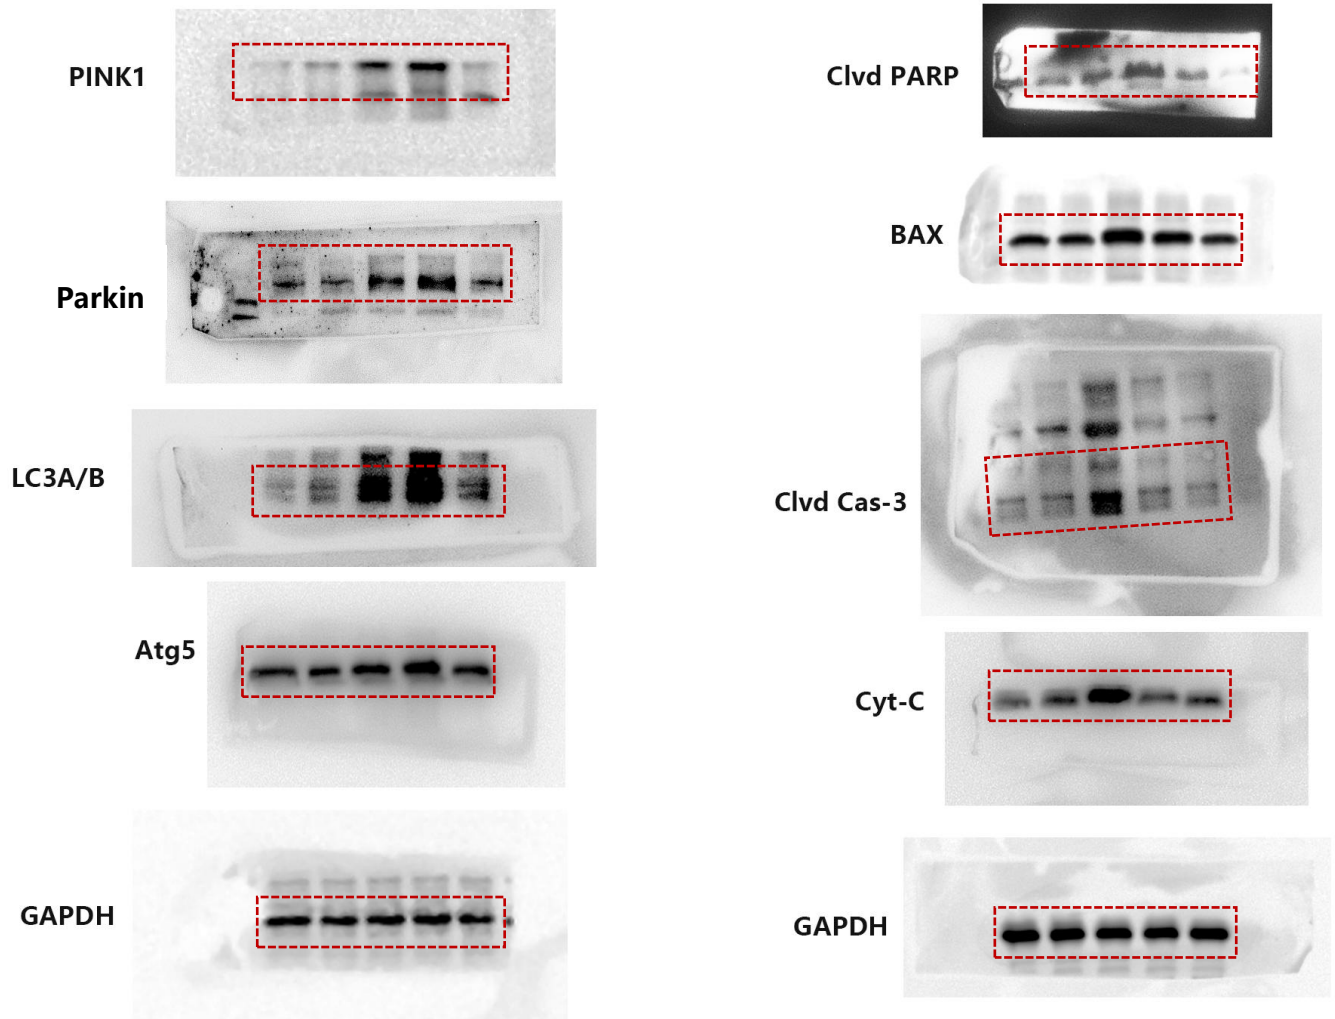

Supplement: 41419_2023_5595_MOESM3_ESM.pdf [file 41419_2023_5595_MOESM3_ESM.pdf]
