# Supplementary material for: PINK1/Parkin-mediated mitophagy inhibits osteoblast apoptosis induced by advanced oxidation protein products
Source: PubMed Central journal article supplement (PMC9905061; doi:10.1038/s41419-023-05595-5), 2023-02-07
Supplement: 41419_2023_5595_MOESM1_ESM.pdf [file 41419_2023_5595_MOESM1_ESM.pdf]

## Supplementary Material

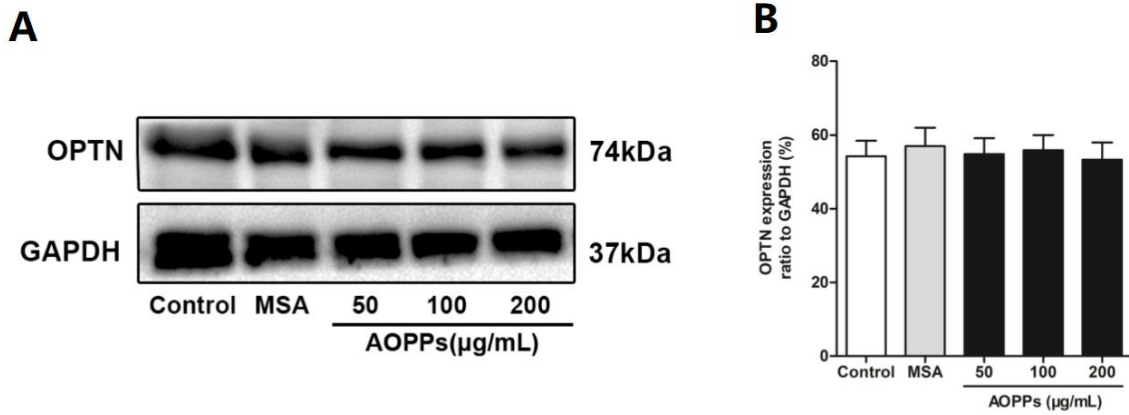

**Supplementary Material Fig.1 A-B:** Optineurin (OPTN) expression levels in AOPPs stimulated (0-200 µg/ml, 24 h) MC3T3-E1 cells. No significant difference was detected among each group.
